# Supplementary material for: Characterization of Bacterial Cellulose Produced by Komagataeibacter maltaceti P285 Isolated from Contaminated Honey Wine
Source: MDPI journal article supplement (doi:10.3390/microorganisms10030528), 2022-02-28
Supplement: s1 [file s1]

## Supplementary Material

### **Characterization of Bacterial Cellulose Produced by *Komagataeibacter maltaceti* P285 Isolated from Contaminated Honey Wine**

Narumol Thongwai, Wirapong Futui, Nanthiwa Ladpala, Benjamat Sirichai,  
Anuwat Weechan, Jirapat Kanklai and Patthanasak Rungsirivanich

## Legends of Supplementary Figures and Tables

**Supplementary Figure S1.** Final media pH of HS broth cultivated by *K. maltaceti* P285, *K. pomaceti* O277 and *K. nataicola* TISTR 975 and incubated at different temperatures for 7 days (A). (B) Final media pH of culture broth after cultivation in HS broth with varying initial media pH and incubated at 30°C for 7 days.

**Supplementary Figure S2.** Final media pH of modified MSM with varying carbon sources; citric acid (A), ethanol (B), glucose (C) and sucrose (D) cultivated by *K. maltaceti* P285, *K. pomaceti* O277 and *K. nataicola* TISTR 975 and incubated at 30°C for 7 days.

**Supplementary Figure S3.** Final media pH of modified MSM with different nitrogen sources; peptone (A), yeast extract (B), (NH<sub>4</sub>)<sub>2</sub>HPO<sub>4</sub> (C) and NaNO<sub>3</sub> (D) cultivated by *K. maltaceti* P285, *K. pomaceti* O277 and *K. nataicola* TISTR 975 and incubated at 30°C for 7 days.

**Supplementary Figure S4.** Final media pH of sugarcane (A) and honey (B) solutions when cultivated by *K. maltaceti* P285, *K. pomaceti* O277 and *K. nataicola* TISTR 975 and incubated at 30°C for 7 days.

**Supplementary Figure S5.** Final media pH of modified sugarcane (S1 and S2) and honey (H1 and H2) solutions when cultivated by *K. maltaceti* P285, *K. pomaceti* O277 and *K. nataicola* TISTR 975 and incubated at 30°C for 7 days. The HS broth and the solutions of sugarcane (8%, w/v; CS) and honey (1:4 of honey : water ratio; CH) supplemented with 0.2% (w/v) yeast extract, pH 6.0 were used as controls.

**Supplementary Table S1.** Dry mass of bacterial cellulose produced by *K. maltaceti* P285 and *K. pomaceti* O277 when cultured in modified MSM with different concentrations of carbon and nitrogen sources. The *K. nataicola* TISTR 975 was used as a control. Data expressed mean ± standard deviation of three independent experiments. The difference letters were considered statistically significant ( $p < 0.05$ ).

Supplementary Figure S1

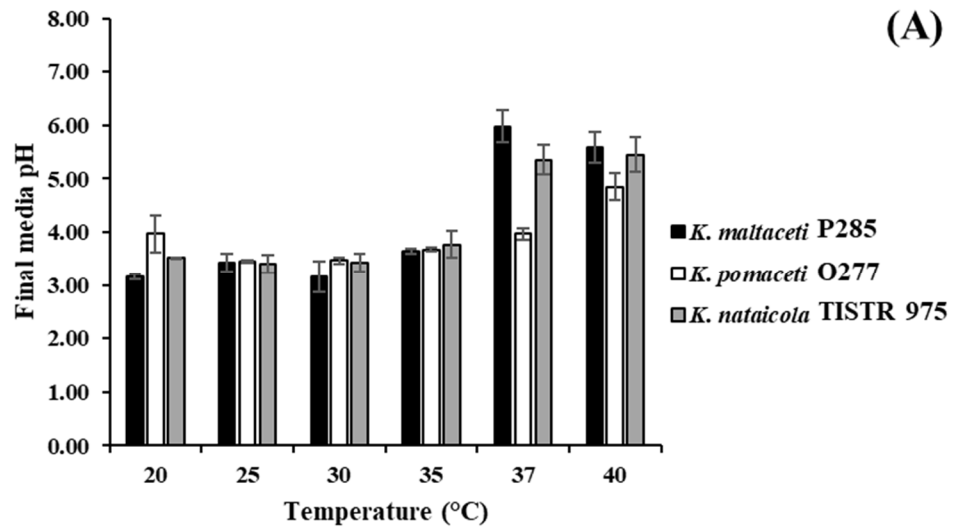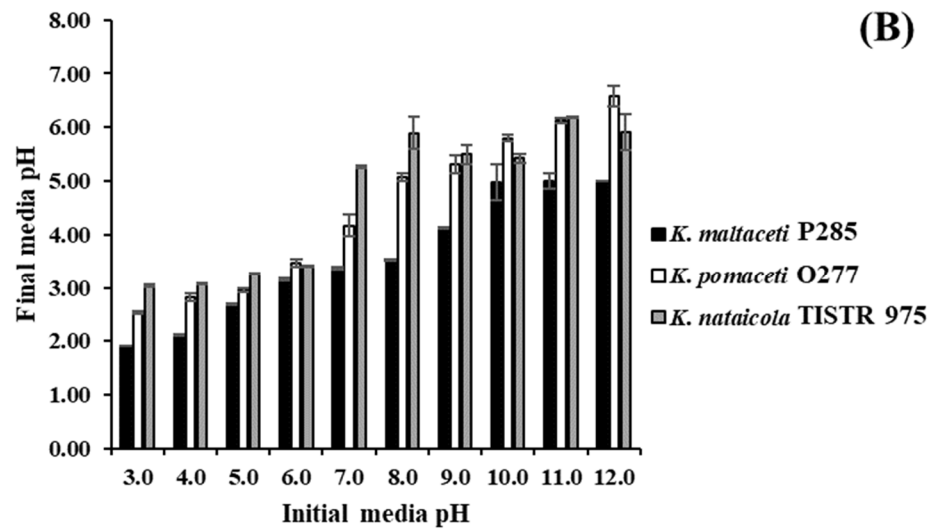

## Supplementary Figure S2

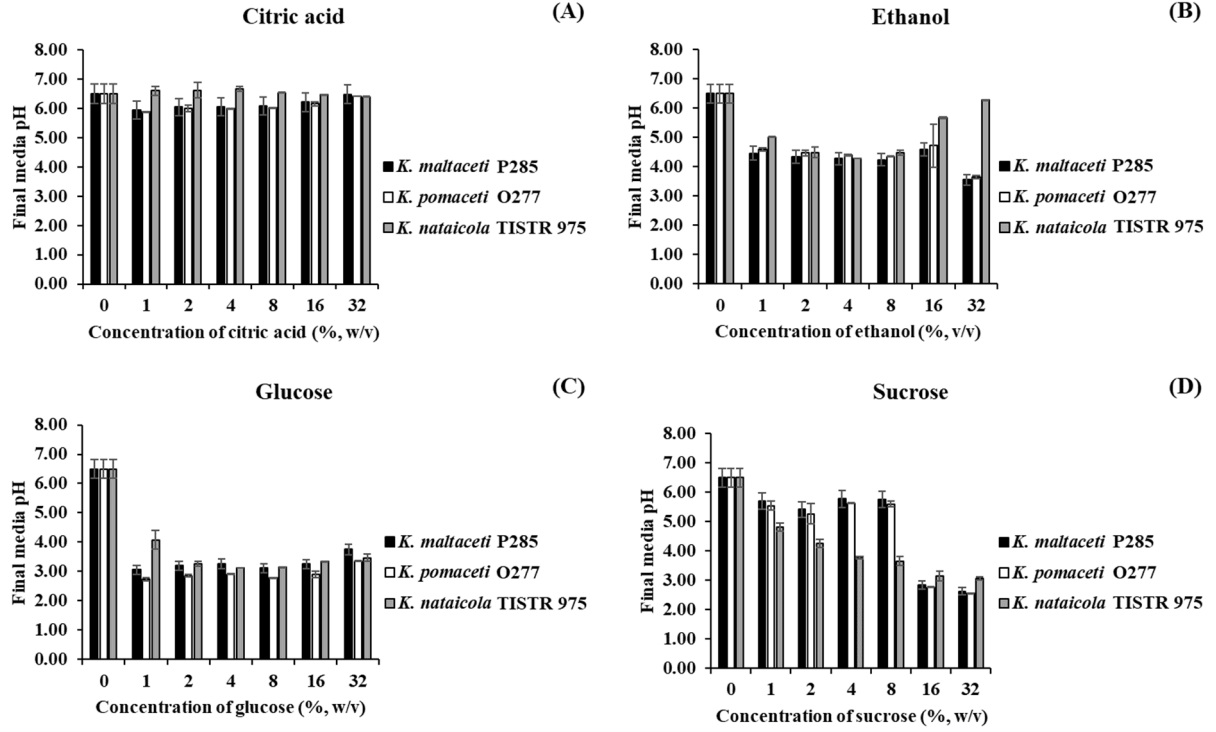

## Supplementary Figure S3

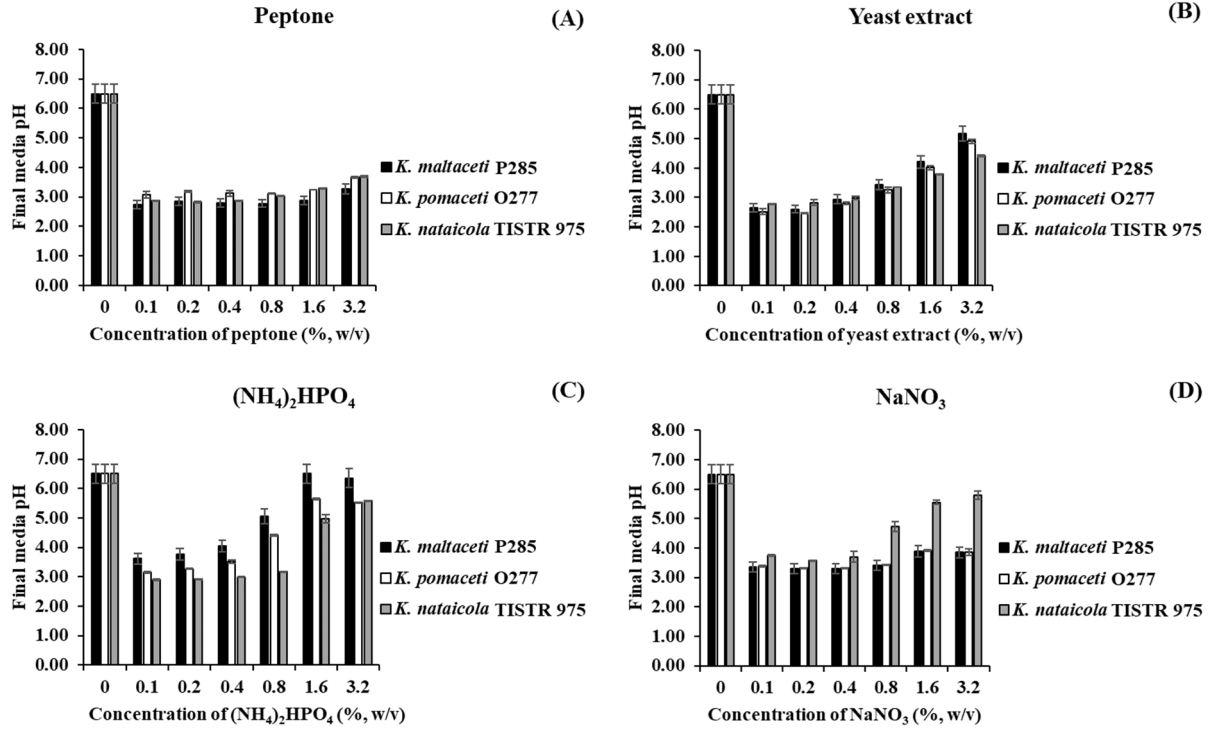

Supplementary Figure S4

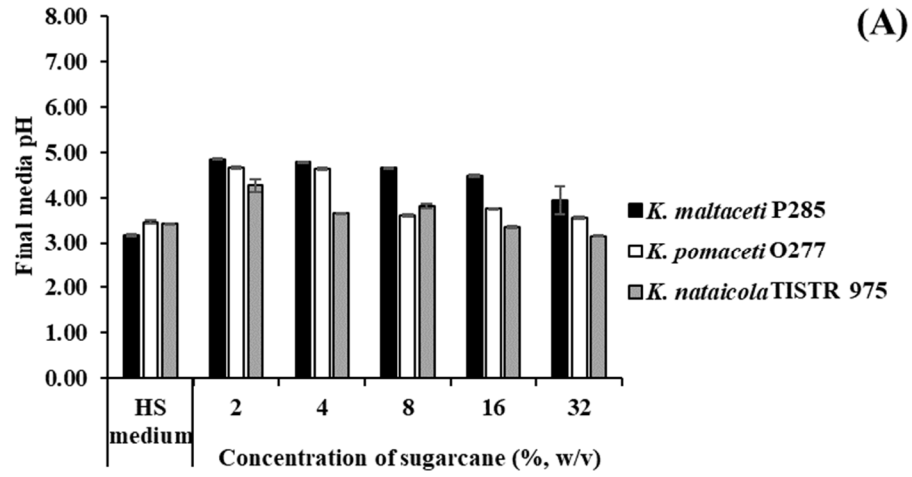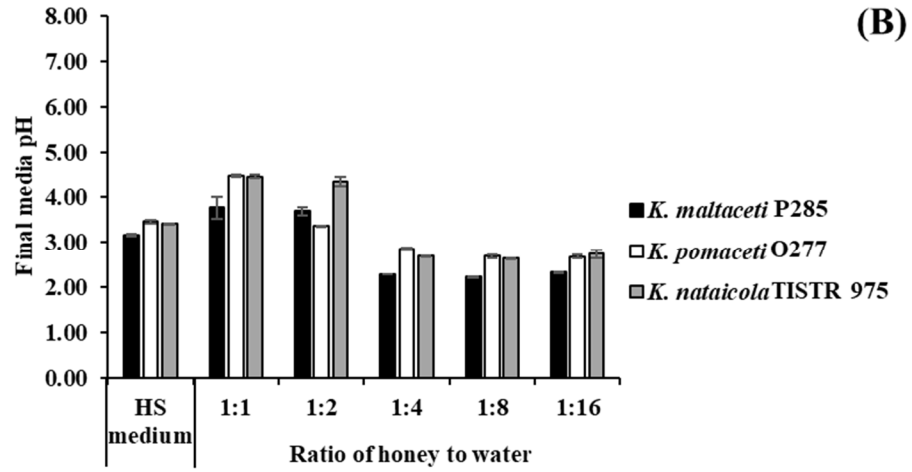

Supplementary Figure S5

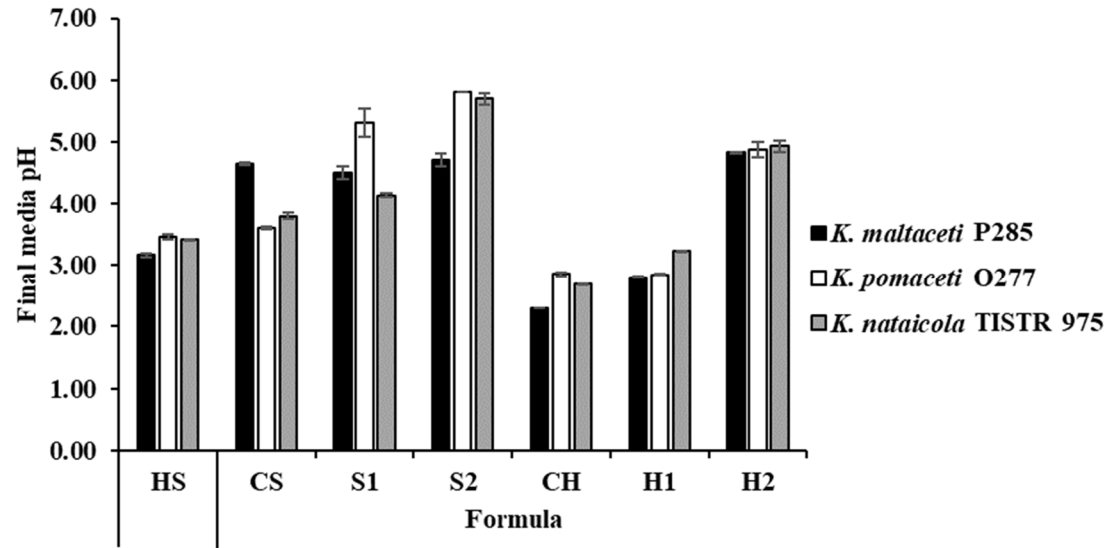

**Supplementary Table S1**

| Dry weight of cellulose (g/L) |                                        |                       |                                                  |                       |                                       |                      |                                                  |                       |                                             |                       |                                                  |                       |
|-------------------------------|----------------------------------------|-----------------------|--------------------------------------------------|-----------------------|---------------------------------------|----------------------|--------------------------------------------------|-----------------------|---------------------------------------------|-----------------------|--------------------------------------------------|-----------------------|
| Carbon source concentration   | <i>Komagataeibacter maltaceti</i> P285 |                       |                                                  |                       | <i>Komagataeibacter pomaceti</i> O277 |                      |                                                  |                       | <i>Komagataeibacter nataicola</i> TISTR 975 |                       |                                                  |                       |
|                               | Citric acid                            | Ethanol               | Glucose                                          | Sucrose               | Citric acid                           | Ethanol              | Glucose                                          | Sucrose               | Citric acid                                 | Ethanol               | Glucose                                          | Sucrose               |
| 0%                            | 0 <sup>a</sup>                         | 0 <sup>a</sup>        | 0 <sup>f</sup>                                   | 0 <sup>g</sup>        | 0 <sup>a</sup>                        | 0 <sup>a</sup>       | 0 <sup>f</sup>                                   | 0 <sup>g</sup>        | 0 <sup>d</sup>                              | 0 <sup>a</sup>        | 0 <sup>f</sup>                                   | 0 <sup>g</sup>        |
| 1%                            | 0 <sup>a</sup>                         | 0 <sup>a</sup>        | 1.2±0.1 <sup>c</sup>                             | 0.6±0.0 <sup>f</sup>  | 0 <sup>a</sup>                        | 0 <sup>a</sup>       | 1.2±0.2 <sup>c</sup>                             | 1.2±0.1 <sup>f</sup>  | 0.2±0.1 <sup>c</sup>                        | 0.1±0.0 <sup>a</sup>  | 2.9±0.0 <sup>e</sup>                             | 0.7±0.1 <sup>f</sup>  |
| 2%                            | 0 <sup>a</sup>                         | 0 <sup>a</sup>        | 3.0±0.1 <sup>d</sup>                             | 1.7±0.1 <sup>c</sup>  | 0 <sup>a</sup>                        | 0 <sup>a</sup>       | 3.0±0.1 <sup>d</sup>                             | 3.3±1.1 <sup>e</sup>  | 0.6±0.1 <sup>b</sup>                        | 0 <sup>a</sup>        | 7.3±0.1 <sup>d</sup>                             | 1.6±0.2 <sup>c</sup>  |
| 4%                            | 0 <sup>a</sup>                         | 0 <sup>a</sup>        | 4.2±0.2 <sup>c</sup>                             | 3.2±0.2 <sup>d</sup>  | 0 <sup>a</sup>                        | 0 <sup>a</sup>       | 4.4±0.9 <sup>c</sup>                             | 6.2±1.4 <sup>d</sup>  | 0.9±0.1 <sup>a</sup>                        | 0 <sup>a</sup>        | 15.1±0.6 <sup>c</sup>                            | 2.1±0.1 <sup>d</sup>  |
| 8%                            | 0 <sup>a</sup>                         | 0 <sup>a</sup>        | 7.2±0.4 <sup>b</sup>                             | 4.2±0.2 <sup>c</sup>  | 0 <sup>a</sup>                        | 0 <sup>a</sup>       | 8.2±0.4 <sup>b</sup>                             | 8.1±0.7 <sup>c</sup>  | 0.5±0.2 <sup>b</sup>                        | 0 <sup>a</sup>        | 20.5±0.6 <sup>b</sup>                            | 5.3±1.2 <sup>c</sup>  |
| 16%                           | 0 <sup>a</sup>                         | 0 <sup>a</sup>        | 11.3±0.6 <sup>a</sup>                            | 4.9±0.2 <sup>bc</sup> | 0 <sup>a</sup>                        | 0 <sup>a</sup>       | 11.9±1.6 <sup>a</sup>                            | 9.4±0.2 <sup>b</sup>  | 0 <sup>d</sup>                              | 0 <sup>a</sup>        | 21.7±0.6 <sup>a</sup>                            | 8.0±1.1 <sup>b</sup>  |
| 32%                           | 0 <sup>a</sup>                         | 0 <sup>a</sup>        | 1.2±0.1 <sup>c</sup>                             | 6.7±0.3 <sup>a</sup>  | 0 <sup>a</sup>                        | 0 <sup>a</sup>       | 1.2±0.4 <sup>c</sup>                             | 12.8±1.3 <sup>a</sup> | 0 <sup>d</sup>                              | 0 <sup>a</sup>        | 16.0±0.5 <sup>c</sup>                            | 16.7±1.2 <sup>a</sup> |
| Nitrogen source concentration | <i>Komagataeibacter maltaceti</i> P285 |                       |                                                  |                       | <i>Komagataeibacter pomaceti</i> O277 |                      |                                                  |                       | <i>Komagataeibacter nataicola</i> TISTR 975 |                       |                                                  |                       |
|                               | Peptone                                | Yeast extract         | (NH <sub>4</sub> ) <sub>2</sub> HPO <sub>4</sub> | NaNO <sub>3</sub>     | Peptone                               | Yeast extract        | (NH <sub>4</sub> ) <sub>2</sub> HPO <sub>4</sub> | NaNO <sub>3</sub>     | Peptone                                     | Yeast extract         | (NH <sub>4</sub> ) <sub>2</sub> HPO <sub>4</sub> | NaNO <sub>3</sub>     |
| 0%                            | 0 <sup>d</sup>                         | 0 <sup>e</sup>        | 0 <sup>d</sup>                                   | 0 <sup>c</sup>        | 0 <sup>c</sup>                        | 0 <sup>e</sup>       | 0 <sup>e</sup>                                   | 0 <sup>c</sup>        | 0 <sup>g</sup>                              | 0 <sup>f</sup>        | 0 <sup>e</sup>                                   | 0 <sup>e</sup>        |
| 0.1%                          | 1.6±0.0 <sup>c</sup>                   | 1.3±0.1 <sup>d</sup>  | 1.3±0.0 <sup>b</sup>                             | 2.8±0.1 <sup>a</sup>  | 2.0±0.0 <sup>b</sup>                  | 1.0±0.0 <sup>d</sup> | 2.9±0.0 <sup>b</sup>                             | 2.8±0.1 <sup>a</sup>  | 3.9±0.2 <sup>f</sup>                        | 5.9±0.5 <sup>e</sup>  | 5.0±0.6 <sup>c</sup>                             | 6.5±0.0 <sup>b</sup>  |
| 0.2%                          | 1.7±0.2 <sup>c</sup>                   | 1.2±0.0 <sup>d</sup>  | 1.7±0.1 <sup>a</sup>                             | 3.0±0.1 <sup>a</sup>  | 2.0±0.2 <sup>b</sup>                  | 1.0±0.0 <sup>d</sup> | 3.9±0.9 <sup>a</sup>                             | 3.0±0.0 <sup>a</sup>  | 5.0±0.3 <sup>e</sup>                        | 6.3±0.3 <sup>e</sup>  | 3.9±0.1 <sup>d</sup>                             | 7.3±0.5 <sup>a</sup>  |
| 0.4%                          | 2.3±0.0 <sup>b</sup>                   | 1.3±0.1 <sup>d</sup>  | 1.6±0.2 <sup>a</sup>                             | 3.1±0.2 <sup>a</sup>  | 2.8±0.8 <sup>ab</sup>                 | 1.0±0.2 <sup>d</sup> | 3.6±0.0 <sup>a</sup>                             | 3.1±0.2 <sup>a</sup>  | 6.1±0.2 <sup>d</sup>                        | 7.6±0.8 <sup>d</sup>  | 6.5±0.5 <sup>b</sup>                             | 7.5±0.1 <sup>a</sup>  |
| 0.8%                          | 1.7±0.0 <sup>c</sup>                   | 3.8±0.2 <sup>c</sup>  | 1.1±0.1 <sup>b</sup>                             | 1.6±0.1 <sup>b</sup>  | 2.0±0.3 <sup>b</sup>                  | 3.1±0.2 <sup>c</sup> | 2.6±0.1 <sup>c</sup>                             | 1.6±0.1 <sup>b</sup>  | 9.6±1.5 <sup>c</sup>                        | 9.8±0.3 <sup>c</sup>  | 11.1±0.2 <sup>a</sup>                            | 2.2±0.3 <sup>c</sup>  |
| 1.6%                          | 1.7±0.1 <sup>c</sup>                   | 7.1±0.4 <sup>b</sup>  | 0.9±0.0 <sup>c</sup>                             | 1.5±0.1 <sup>b</sup>  | 2.1±0.1 <sup>b</sup>                  | 5.7±0.0 <sup>b</sup> | 2.0±0.0 <sup>d</sup>                             | 1.6±0.0 <sup>b</sup>  | 15.6±0.8 <sup>b</sup>                       | 13.0±0.6 <sup>b</sup> | 10.7±0.2 <sup>a</sup>                            | 2.1±0.1 <sup>c</sup>  |
| 3.2%                          | 2.7±0.1 <sup>a</sup>                   | 11.9±0.6 <sup>a</sup> | 0 <sup>d</sup>                                   | 0 <sup>c</sup>        | 3.3±0.3 <sup>a</sup>                  | 9.6±0.1 <sup>a</sup> | 0.3±0.0 <sup>e</sup>                             | 0 <sup>c</sup>        | 18.1±0.5 <sup>a</sup>                       | 21.1±0.2 <sup>a</sup> | 0 <sup>e</sup>                                   | 0.7±0.0 <sup>d</sup>  |
